# Supplementary material for: A Bayesian state-space model using age-at-harvest data for estimating the population of black bears (Ursus americanus) in Wisconsin
Source: PubMed Central journal article supplement (PMC6102245; doi:10.1038/s41598-018-30988-4), 2018-08-20
Supplement: 41598_2018_30988_MOESM3_ESM.pdf [file 41598_2018_30988_MOESM3_ESM.pdf]

A Bayesian state-space model using age-at-harvest data for estimating the population of black bears (*Ursus americanus*) in Wisconsin

Maximilian L. Allen, Andrew S. Norton, Glenn Stauffer, Nathan M. Roberts, Yanshi Luo, Qing Li, David MacFarland, and Timothy R. Van Deelen

Supplementary Information 2b. The results of the 2017 Wisconsin Department of Natural Resources population analysis.

# Black Bear Population Analyses 2017

By Catherine C. Dennison, Nathan M. Roberts and David M. MacFarland

## **Abstract**

Bear visitation rates averaged 55% for 17 bait station surveys conducted in the primary range (Zones A, B, and D), and 25% for 7 surveys conducted in the peripheral range (Zone C). Revised population models produced a statewide estimate of approximately 28,600 bears in fall 2017. A harvest of 5,000 bears was approved by the Natural Resources Board for the 2017 season.

## **Methods**

Bear bait station surveys were conducted by wildlife management and research personnel in the 17 counties comprising the primary bear range and 7 counties within the peripheral range in 2017. The surveys were run between 15 June and 15 July, and consisted of 50 bait stations placed at 0.5-mile intervals along drivable roads. A plastic mesh overwrap bag filled with approximately 2 lb. of fresh meat was securely wired to a tree about 7 feet above the ground at each bait station. Bait stations were checked for bear visitations after 7 nights.

A station was considered to have been visited by bears if the bag of meat was gone and the wire securing it had been stretched or broken or by marks on the trees and/or trails leading to the station. Bait stations were considered inoperable and not included in the calculations if they could not be found or if animals other than bears had taken the bait.

Three-year running average visitation rates ( $[\text{year} \times 2 + \text{year}^{+1}]/3$  for first year;  $[\text{year}^{-1} + \text{year} \times 2]/3$  for last year, and  $[\text{year}^{-1} + \text{year} + \text{year}^{+1}]/3$  for all other years) were used as an index to bear population trends. Combining years reduced annual fluctuations resulting from small sample sizes and annual changes in the abundance of natural foods.

Registration is required for all harvested bears. Registration is completed electronically by phone, computer or at a cooperating station. An upper first premolar, submitted by mail, is required to complete legal registration. The sex and county of kill were recorded for each bear. Teeth were sent to the Matson's Lab in Milltown, MT for processing, and ages were assigned by counting annuli in the cementum.

Wisconsin's Bear Population Model was adapted from one developed and used in Minnesota (Garshelis 1990). Zone-specific models were updated in 2014 to include the most recent bear harvest, age, and bait station data, and were used to estimate bear population size in each Bear Management Zone (Figure 1). Starting population size in the models was adjusted in all zones in 2013 based on estimates from the tetracycline mark-recapture study conducted in 2011 and 2012 (MacFarland 2009, Rolley et al. 2014). Previously models were calibrated to maximize the correlation between model simulated population trends and trends in bait-station visitations.

## **Results**

Bear visitation rates in the 2017 bait station survey averaged 67% in Zone A, 42% in Zone B, 52% in Zone D, and 55% in the primary bear range (zones A, B, and D combined) (Table 1). Bear visitation rates in Zone C (peripheral range) averaged 25%.

The 3-year mean visitation rates in the primary bear range increased steadily during the mid-1980s and early 1990s, was fairly stable during the mid-to-late 1990s, slowly increased during the 2000s, declined during the late 2000s, and has been relatively stable since 2012 (Fig. 2). In the peripheral range (Zone C), bait station data suggests a substantial increase in the bear population during the late 1990s and early 2000s; 3-year average visitation rates doubled from 17% to 35% during 1996-2004. Visitation rates during the last 10 years in Zone C were relatively stable.

Teeth were collected from 3,852 of the 4,682 bears harvested in 2016. The age structure of female bears harvested during 1993-2016 has been relatively stable (Table 2); mean age of harvested female bears averaged 4.6 years (range 3.7 - 5.3). The age structure of harvested male bears has shifted to a younger distribution over the last 24 years with the mean age of harvested males declining from approximately 4 years to about 3 years over the period.

Zone-specific models were calibrated to yield estimates of the 2011 fall population that closely matched estimates from the 2011 tetracycline mark-recapture study. The models produced a statewide population estimate of approximately 28,600 bears in fall 2017 (Table 3). This included 5,100 bears in Zone A, 5,200 in Zone B, 9,700 in Zone C, and 8,700 in Zone D. The 2017 population estimates equate to bear densities of 0.9 bears/mi<sup>2</sup> of bear range in Zone A, 1.0 bears/mi<sup>2</sup> in Zone B, 1.1 bears/mi<sup>2</sup> of occupied range in Zone C, and 1.6 bears/mi<sup>2</sup> in Zone D.

## **Discussion**

Population models that were calibrated to the 2011 zone-specific mark-recapture estimates, together with trends in bait-station visitations, suggest that higher harvests since 2009 reduced the bear population in zone A and stabilized population growth in Zone B (Table 3). Our model for Zone D suggests that higher recent harvests in Zone D may be slowing population growth. The population model for Zone C suggests the population has continued to increase in recent years.

The Natural Resources Board approved a harvest quota of 5,000 bears for the 2017 season. This included 1,200 bears in Zone A, 900 in Zone B, 1,300 in Zone C, and 1,600 in Zone D.

## **Literature Cited**

- Garshelis, D.L. 1990. Monitoring effects of harvest on black bear populations in North America: a review and evaluation of techniques. *East Workshop Black Bear Res. and Manage.* 10:120-144.
- MacFarland, D.M. 2009. Population estimation, habitat associations and range expansion of black bears in the upper Midwest. Ph.D. dissertation. University of Wisconsin, Madison.
- Rolley, R.E., D.M. MacFarland, N.M. Roberts, and T.R. Pearson. 2014. Black Bear Population Analyses, 2014. Pages 28-34 in J. Kitchell and B. Dhuey (editors). *Wisconsin Wildlife Surveys: August 2014*. Wisconsin Department of Natural Resources, Bureau of Science Services, Madison, WI.

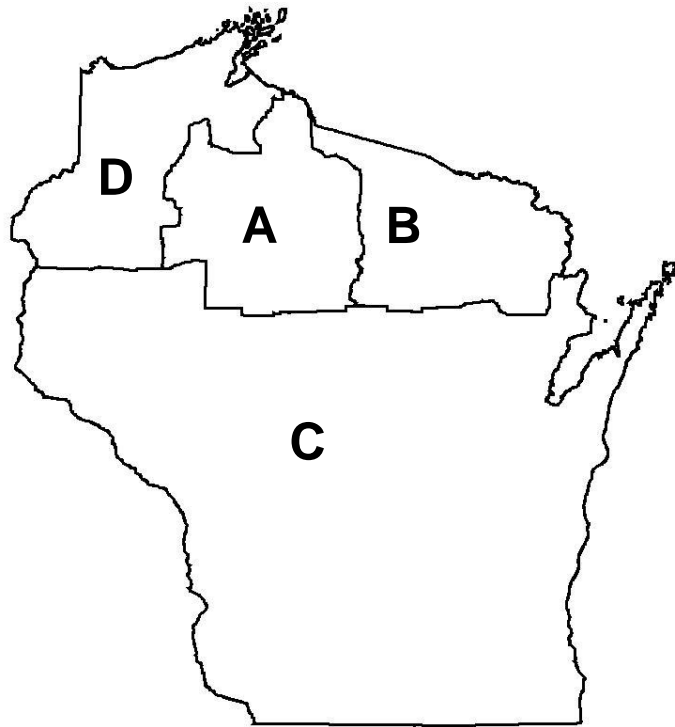

**Figure 1.** Wisconsin's Black Bear Management Zones, 2017.

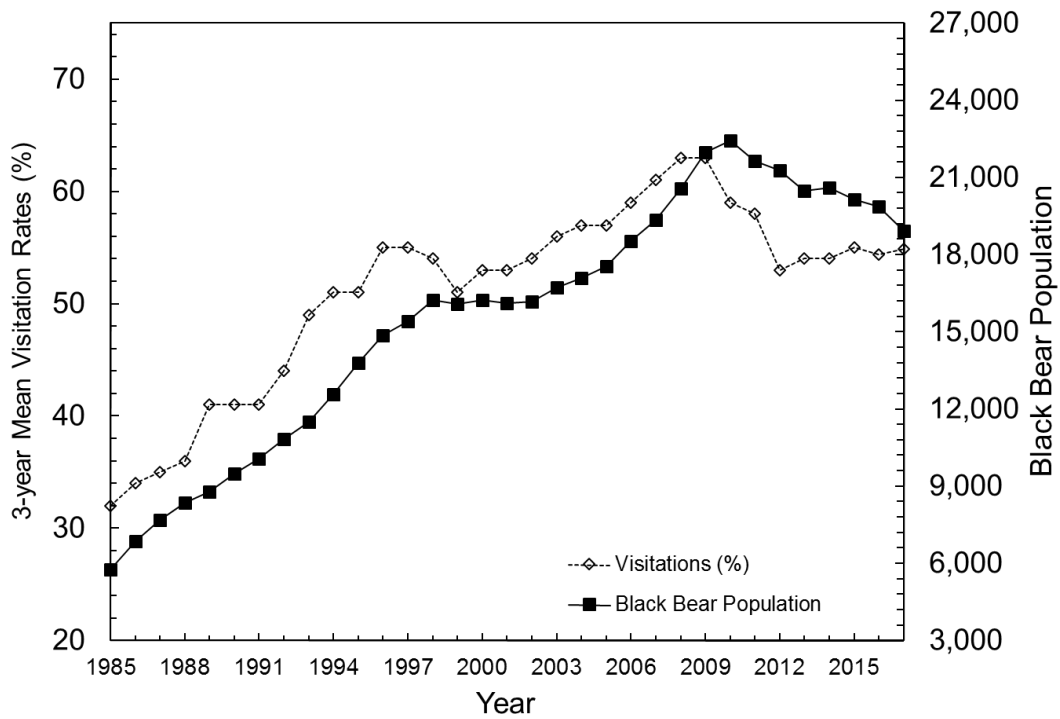

**Figure 2.** Bear visitation rates on bait station surveys (3-yr running average) and pre-hunt population estimates calculated by the revised models for the primary range (Zones A, B, and D), 1985-2017.

**Table 1.** *Percent of bear bait stations visited by bears, 2004-2017.*

| <b>County</b>           | <b>2005</b> | <b>2006</b> | <b>2007</b> | <b>2008</b> | <b>2009</b> | <b>2010</b> | <b>2011</b> | <b>2012</b> | <b>2013</b> | <b>2014</b> | <b>2015</b> | <b>2016</b> | <b>2017</b> |
|-------------------------|-------------|-------------|-------------|-------------|-------------|-------------|-------------|-------------|-------------|-------------|-------------|-------------|-------------|
| Ashland                 | 71          | 76          | 52          | 59          | 66          | 33          | 42          | 27          | 32          | 69          | 65          | 81          | 41          |
| Bayfield                | 75          | 52          | 76          | 67          | 44          | 67          | 64          | 56          | 53          | 69          | 39          | 40          | 56          |
| Burnett                 | 46          | 43          | 37          | 35          | 5           | 51          | 48          | 43          | 21          | 38          | 23          | 30          | 23          |
| Douglas                 | 30          | 30          | 41          | 73          | 49          | 63          | 33          | 50          | 38          | 48          | 43          | 48          | N/A         |
| Florence                | 83          | 66          | 86          | 75          | 68          | 79          | 30          | 59          | 79          | 79          | 56          | 56          | 43          |
| Forest                  | 62          | 63          | 88          | 78          | 76          | 84          | 58          | 76          | 57          | 82          | 55          | 47          | 65          |
| Iron                    | 64          | 69          | 71          | 58          | 88          | 77          | 94          | 76          | 30          | 23          | 63          | 58          | 56          |
| Langlade                | 63          | 53          | 44          | 46          | 48          | 46          | 61          | 57          | 56          | 37          | 41          | 38          | 56          |
| Lincoln                 | 30          | 39          | 73          | 61          | 64          | 68          | 37          | 42          | 60          | 28          | 38          | 37          | 47          |
| Marinette               | 50          | 48          | 64          | 31          | 32          | 57          | 34          | 41          | 23          | 27          | 31          | 34          | 24          |
| Oconto                  | 23          | 17          | 23          | 53          | 39          | 48          | 43          | 24          | 17          | 41          | 17          | 29          | 26          |
| Oneida                  | 48          | 54          | 57          | 54          | 39          | 62          | 49          | 60          | 55          | 61          | 70          | 74          | 76          |
| Price                   | 26          | 33          | 50          | 66          | 69          | 84          | 67          | 53          | 57          | 67          | 66          | 65          | 59          |
| Rusk                    | 98          | 68          | 98          | 92          | 92          | 93          | 78          | 98          | 88          | 79          | 72          | 94          | 90          |
| Sawyer                  | 90          | 77          | 87          | 80          | 70          | 60          | 60          | 46          | 51          | 64          | 59          | 51          | 61          |
| Taylor                  | 90          | 66          | 92          | 86          | 89          | 76          | 75          | 62          | 65          | 79          | 66          | 89          | 87          |
| Vilas                   | 32          | 56          | 39          | 68          | 34          | 41          | 28          | 29          | 40          | 26          | 62          | 41          | 20          |
| Washburn                | 92          | 70          | 88          | 87          | 70          | 80          | 78          | 76          | 63          | 79          | 84          | 97          | 78          |
| <b>Primary Range</b>    | <b>60</b>   | <b>53</b>   | <b>65</b>   | <b>65</b>   | <b>58</b>   | <b>66</b>   | <b>54</b>   | <b>55</b>   | <b>51</b>   | <b>56</b>   | <b>53</b>   | <b>55</b>   | <b>55</b>   |
|                         |             |             |             |             |             |             |             |             |             |             |             |             |             |
| Barron                  | 30          | 5           | 3           | 19          | 40          | 29          | 44          | 34          | 45          | 35          | 22          | 40          | 45          |
| Chippewa                | 47          | 17          | 35          | 44          | 40          | 53          | 72          | 78          | 42          | 63          | 62          | 50          | 47          |
| Clark                   | 48          | 28          | 45          | 47          | 55          | 33          | 42          | 36          | 44          | 36          | 43          | 49          | 15          |
| Jackson                 | 8           | 24          | 13          | 14          | 13          | 15          | 20          | 11          | 3           | 10          | 8           | 22          | 0           |
| Marathon                | 53          | 45          | 38          | 51          | 42          | 44          | 44          | 42          | 30          | 29          | 31          | 34          | 23          |
| Menominee               | 14          | 0           | 6           | 26          | 9           | 13          | ---         | ---         | ---         | 38          | 16          | 18          | 39          |
| Shawano                 | 3           | 0           | 0           | 4           | 10          | 0           | 0           | 3           | 10          | 9           | 0           | 7           | 5           |
| <b>Peripheral Range</b> | <b>30</b>   | <b>18</b>   | <b>22</b>   | <b>31</b>   | <b>31</b>   | <b>27</b>   | <b>32</b>   | <b>34</b>   | <b>30</b>   | <b>32</b>   | <b>28</b>   | <b>32</b>   | <b>25</b>   |

**Table 2.** *Age classes of bears harvested in Wisconsin, 1993-2016.*

| Year | Sex    | Percent in age class |        |        | No. aged | Mean age |
|------|--------|----------------------|--------|--------|----------|----------|
|      |        | 1-2 yr               | 3-9 yr | 10+ yr |          |          |
| 1993 | Male   | 50.9                 | 41.7   | 7.4    | 405      | 4.3      |
|      | Female | 37.8                 | 41.7   | 7.4    | 405      | 4.3      |
| 1994 | Male   | 62.6                 | 31.4   | 6.0    | 441      | 3.9      |
|      | Female | 50.9                 | 45.0   | 4.1    | 271      | 4.2      |
| 1995 | Male   | 55.7                 | 41.4   | 2.9    | 600      | 3.6      |
|      | Female | 37.7                 | 52.0   | 10.5   | 435      | 5.3      |
| 1996 | Male   | 60.0                 | 37.3   | 2.7    | 771      | 3.6      |
|      | Female | 46.8                 | 45.6   | 7.6    | 536      | 4.7      |
| 1997 | Male   | 65.0                 | 32.6   | 2.5    | 765      | 3.5      |
|      | Female | 47.9                 | 44.2   | 7.9    | 620      | 4.6      |
| 1998 | Male   | 65.0                 | 33.4   | 1.6    | 1,134    | 3.3      |
|      | Female | 49.0                 | 44.2   | 6.9    | 904      | 4.5      |
| 1999 | Male   | 67.6                 | 29.9   | 2.4    | 1,058    | 3.3      |
|      | Female | 51.5                 | 39.3   | 9.2    | 954      | 4.7      |
| 2000 | Male   | 68.1                 | 29.0   | 2.9    | 1,227    | 3.3      |
|      | Female | 49.8                 | 41.5   | 8.7    | 1,046    | 4.7      |
| 2001 | Male   | 67.8                 | 29.2   | 3.0    | 1,250    | 3.4      |
|      | Female | 51.2                 | 40.8   | 8.0    | 1,023    | 4.6      |
| 2002 | Male   | 59.5                 | 34.6   | 5.9    | 1,094    | 3.9      |
|      | Female | 44.5                 | 43.7   | 11.8   | 946      | 5.2      |
| 2003 | Male   | 64.3                 | 33.3   | 2.4    | 1,349    | 3.1      |
|      | Female | 48.4                 | 43.0   | 8.2    | 1,065    | 4.6      |
| 2004 | Male   | 62.9                 | 33.9   | 7.9    | 1,332    | 3.2      |
|      | Female | 48.4                 | 43.7   | 3.2    | 1,177    | 4.3      |
| 2005 | Male   | 57.1                 | 40.1   | 2.8    | 1,267    | 3.4      |
|      | Female | 44.7                 | 47.8   | 7.6    | 898      | 4.5      |
| 2006 | Male   | 58.8                 | 38.7   | 2.5    | 1,421    | 3.4      |
|      | Female | 44.8                 | 47.0   | 8.2    | 1,258    | 4.6      |
| 2007 | Male   | 61.0                 | 36.6   | 2.3    | 1,367    | 3.3      |
|      | Female | 42.0                 | 48.3   | 9.7    | 1,135    | 4.8      |
| 2008 | Male   | 58.1                 | 38.5   | 3.4    | 1,456    | 3.6      |
|      | Female | 42.9                 | 49.0   | 8.0    | 1,169    | 4.7      |
| 2009 | Male   | 59.6                 | 38.4   | 2.0    | 1,794    | 3.3      |
|      | Female | 45.6                 | 47.2   | 7.3    | 1,523    | 4.4      |
| 2010 | Male   | 68.5                 | 30.0   | 1.4    | 2,144    | 2.9      |
|      | Female | 50.0                 | 42.1   | 7.9    | 2,190    | 4.3      |
| 2011 | Male   | 61.4                 | 34.6   | 4.0    | 1,882    | 3.4      |
|      | Female | 42.2                 | 47.1   | 10.8   | 1,786    | 5.0      |
| 2012 | Male   | 70.7                 | 27.3   | 2.1    | 2,984    | 3.0      |
|      | Female | 49.0                 | 41.5   | 9.6    | 2,171    | 4.5      |
| 2013 | Male   | 60.0                 | 36.4   | 3.6    | 1,884    | 3.4      |
|      | Female | 42.5                 | 46.2   | 11.3   | 1,753    | 4.9      |
| 2014 | Male   | 69.2                 | 28.9   | 1.9    | 2,098    | 2.9      |
|      | Female | 50.9                 | 41.6   | 7.6    | 2,047    | 4.3      |
| 2015 | Male   | 66.5                 | 31.6   | 2.0    | 1,777    | 3.0      |
|      | Female | 45.8                 | 44.3   | 9.9    | 1,650    | 4.5      |
| 2016 | Male   | 66.9                 | 30.9   | 2.2    | 1,839    | 2.4      |
|      | Female | 50.1                 | 41.9   | 8.0    | 1,945    | 3.7      |

**Table 3.** Modeled bear population estimates by management zone, 1988-2017. Estimates are for fall, pre-hunt populations and include adults, yearlings, and cubs.

| Year | Bear Management Zone |       |       |       | State  |
|------|----------------------|-------|-------|-------|--------|
|      | A                    | B     | C     | D     |        |
| 1988 | 3,700                | 1,700 | 850   | 3,000 | 9,250  |
| 1989 | 3,700                | 1,900 | 950   | 3,200 | 9,750  |
| 1990 | 3,900                | 2,000 | 1,100 | 3,500 | 10,500 |
| 1991 | 4,100                | 2,100 | 1,150 | 3,800 | 11,150 |
| 1992 | 4,300                | 2,300 | 1,300 | 4,200 | 12,100 |
| 1993 | 4,400                | 2,400 | 1,400 | 4,600 | 12,800 |
| 1994 | 4,800                | 2,600 | 1,500 | 5,200 | 14,100 |
| 1995 | 5,300                | 2,800 | 1,650 | 5,700 | 15,450 |
| 1996 | 6,000                | 2,900 | 1,800 | 6,000 | 16,700 |
| 1997 | 6,300                | 3,000 | 1,950 | 6,100 | 17,350 |
| 1998 | 6,700                | 3,200 | 2,150 | 6,300 | 18,350 |
| 1999 | 6,600                | 3,300 | 2,350 | 6,200 | 18,450 |
| 2000 | 6,600                | 3,600 | 2,600 | 6,100 | 18,900 |
| 2001 | 6,500                | 3,800 | 2,900 | 5,800 | 19,000 |
| 2002 | 6,400                | 4,000 | 3,200 | 5,800 | 19,400 |
| 2003 | 6,600                | 4,300 | 3,650 | 5,800 | 20,350 |
| 2004 | 6,700                | 4,600 | 4,000 | 5,700 | 21,000 |
| 2005 | 7,000                | 4,700 | 4,300 | 5,800 | 21,800 |
| 2006 | 7,400                | 5,000 | 4,650 | 6,100 | 23,150 |
| 2007 | 7,800                | 5,200 | 4,850 | 6,300 | 24,150 |
| 2008 | 8,200                | 5,600 | 5,250 | 6,800 | 25,850 |
| 2009 | 8,600                | 5,800 | 5,650 | 7,500 | 27,550 |
| 2010 | 8,600                | 5,800 | 6,050 | 8,000 | 28,450 |
| 2011 | 7,700                | 5,700 | 6,400 | 8,200 | 28,000 |
| 2012 | 7,300                | 5,400 | 6,950 | 8,600 | 28,250 |
| 2013 | 6,300                | 5,200 | 7,500 | 8,900 | 27,900 |
| 2014 | 6,000                | 5,500 | 7,850 | 9,200 | 28,550 |
| 2015 | 5,600                | 5,500 | 8,350 | 9,100 | 28,550 |
| 2016 | 5,400                | 5,400 | 9,000 | 9,100 | 28,900 |
| 2017 | 5,100                | 5,200 | 9,700 | 8,700 | 28,700 |
