# Supplementary material for: A Bayesian state-space model using age-at-harvest data for estimating the population of black bears (Ursus americanus) in Wisconsin
Source: PubMed Central journal article supplement (PMC6102245; doi:10.1038/s41598-018-30988-4), 2018-08-20
Supplement: 41598_2018_30988_MOESM7_ESM.pdf [file 41598_2018_30988_MOESM7_ESM.pdf]

A Bayesian state-space model using age-at-harvest data for estimating the population of black bears (*Ursus americanus*) in Wisconsin

Maximilian L. Allen, Andrew S. Norton, Glenn Stauffer, Nathan M. Roberts, Yanshi Luo, Qing Li, David MacFarland, and Timothy R. Van Deelen

Supplementary Information 4. The observed harvest (**O**) and aged individuals (**C**) used in the model.

**O**

|      | Male | Female |
|------|------|--------|
| 2009 | 2158 | 1851   |
| 2010 | 2525 | 2608   |
| 2011 | 2191 | 2066   |
| 2012 | 2329 | 2317   |
| 2013 | 2035 | 1917   |
| 2014 | 2286 | 2240   |
| 2015 | 2198 | 2000   |
| 2016 | 2311 | 2371   |

**C**

A1

|      | 1.5 | 2.5 | 3.5 | 4.5 | 5.5 | 6.5 | 7.5 | 8.5 | 9.5 | 10.5+ |
|------|-----|-----|-----|-----|-----|-----|-----|-----|-----|-------|
| 2009 | 370 | 316 | 261 | 127 | 107 | 72  | 74  | 36  | 36  | 108   |
| 2010 | 532 | 549 | 304 | 209 | 129 | 101 | 85  | 42  | 41  | 171   |
| 2011 | 401 | 349 | 226 | 155 | 139 | 96  | 95  | 54  | 69  | 189   |
| 2012 | 491 | 555 | 287 | 184 | 134 | 88  | 83  | 62  | 53  | 202   |
| 2013 | 406 | 334 | 281 | 150 | 105 | 73  | 86  | 56  | 55  | 198   |
| 2014 | 550 | 535 | 256 | 196 | 120 | 100 | 68  | 67  | 46  | 110   |
| 2015 | 391 | 364 | 262 | 155 | 101 | 90  | 54  | 40  | 29  | 163   |
| 2016 | 542 | 430 | 276 | 177 | 130 | 96  | 54  | 40  | 41  | 155   |

A2

|      | 1.5 | 2.5 | 3.5 | 4.5 | 5.5 | 6.5 | 7.5 | 8.5 | 9.5 | 10.5+ |
|------|-----|-----|-----|-----|-----|-----|-----|-----|-----|-------|
| 2009 | 616 | 434 | 300 | 146 | 82  | 57  | 38  | 20  | 18  | 37    |
| 2010 | 823 | 633 | 270 | 197 | 63  | 47  | 25  | 14  | 17  | 31    |
| 2011 | 683 | 464 | 264 | 115 | 102 | 52  | 60  | 33  | 18  | 76    |
| 2012 | 784 | 710 | 248 | 142 | 69  | 51  | 31  | 27  | 15  | 44    |
| 2013 | 689 | 430 | 285 | 132 | 94  | 67  | 50  | 36  | 20  | 66    |
| 2014 | 859 | 604 | 274 | 144 | 77  | 51  | 21  | 19  | 24  | 32    |
| 2015 | 685 | 495 | 257 | 144 | 66  | 34  | 24  | 18  | 17  | 35    |

2016 755 471 265 134 74 48 23 10 10 41
